# Supplementary material for: Combining faecal immunochemical testing with blood test results to identify patients with symptoms at risk of colorectal cancer: a consecutive cohort of 16,604 patients tested in primary care
Source: bioRxiv or medRxiv preprint supplement (doi:10.1101/2021.10.22.21263919), 2021-10-26
Supplement: Supplementary file [file media-2.pdf]

Joint Research Office  
Boundary Brook House  
Churchill Drive, Headington, Oxford OX3 7GB

09 October 2021

To whom it may concern:

**Title: Combining faecal Immunochemical testing with blood test results to identify patients with symptoms at risk of colon cancer: a consecutive cohort of 15,504 patients tested in primary care**

This letter is to confirm that the work referenced above was conducted as a service evaluation with registration, review and approval process within the OUH Datix governance structure (Service evaluation registration identifier: CSS-BIO-3-4730).

As service evaluation, this work is not subject to the Department of Health's *UK Policy Framework for Health and Social Care Research* (2017). It requires neither sponsorship nor research ethics review.

This opinion can be reviewed by reference to the HRA's algorithm, available at <http://www.hra-decisiontools.org.uk/research/> and attendant leaflet, *Defining Research*, or by reference to The Health Care Quality Improvement Partnership (HQIP)'s *Guide for Clinical Audit, Research and Service review*.

Should you require further information, please do not hesitate to contact me.

Sincerely,



Dr Karen Melham  
Sponsorship and Ethics Lead  
Research Services  
University of Oxford

Copy to: Ms Jo Franklin, Research Governance Manager, OUH NHS Foundation Trust
